# Supplementary material
Source: Springer Nature journal article supplement (https://www.springermedizin.de/resource/supplementary/12885_2010_2721_MOESM5_ESM.pdf/9461780)

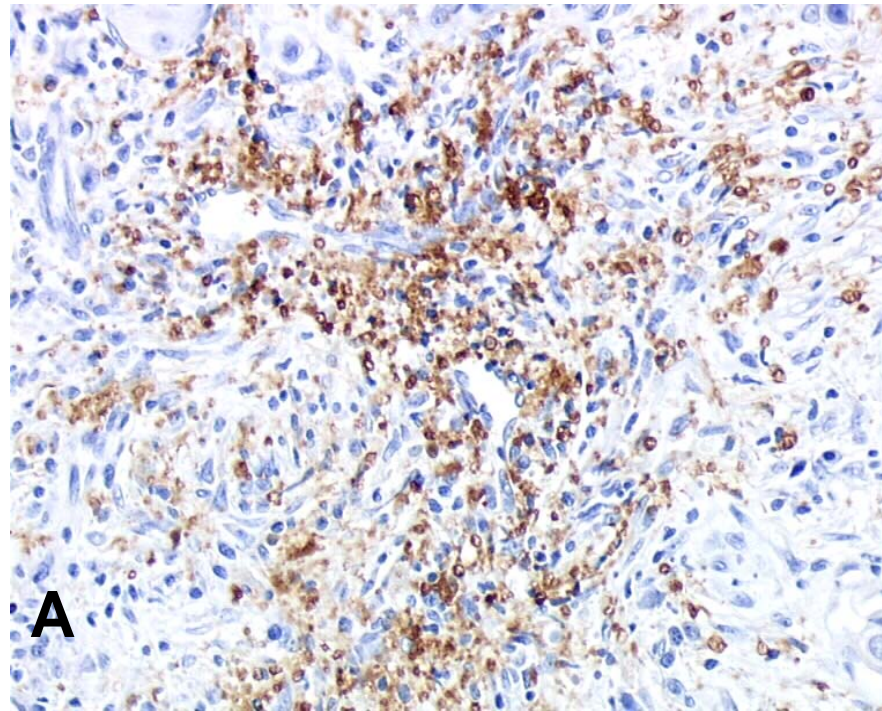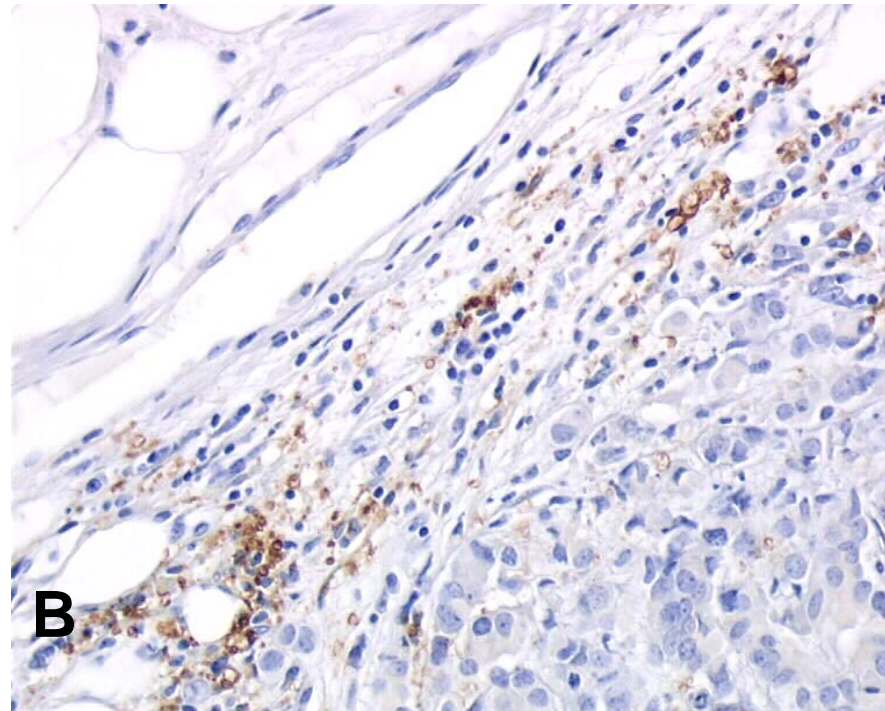

**C**

|                                             |     | CCR7+ SMA+ stromal cells in the primary tumor |    |
|---------------------------------------------|-----|-----------------------------------------------|----|
|                                             |     | Yes                                           | No |
| CCR7+ SMA+ stromal cells in the lymph nodes | Yes | 15                                            | 0  |
|                                             | No  | 6                                             | 8  |

Supplement: MOESM5 [file 9461780]
